# Supplementary material for: Combining the in vivo comet and micronucleus assays: a practical approach to genotoxicity testing and data interpretation
Source: PubMed Central journal article supplement — Mutagenesis. 2009 Dec 6;25(2):187–99. doi: 10.1093/mutage/gep060 (PMC2825345; doi:10.1093/mutage/gep060), 2009-12-06
Supplement: gep060_1.pdf [file gep060_1.pdf]

Test **Describe - Summary**  
 Normally distributed OTM data  
 Dose - 0

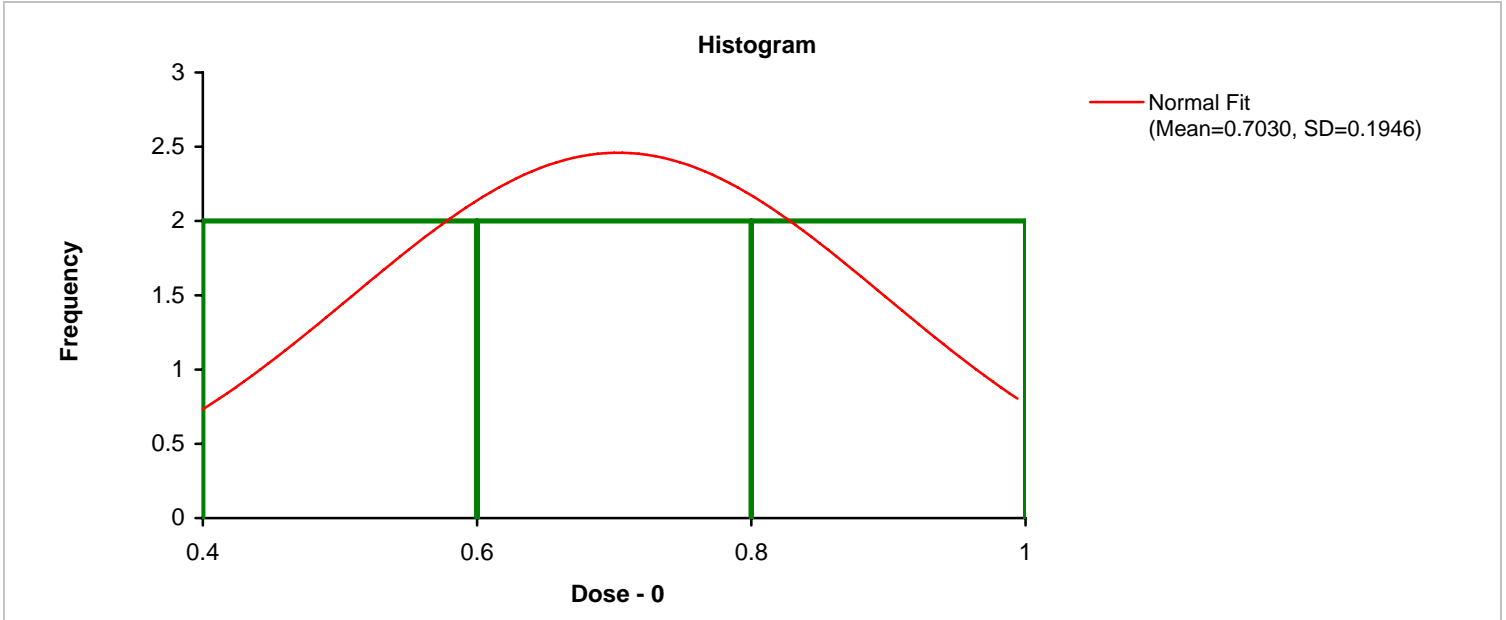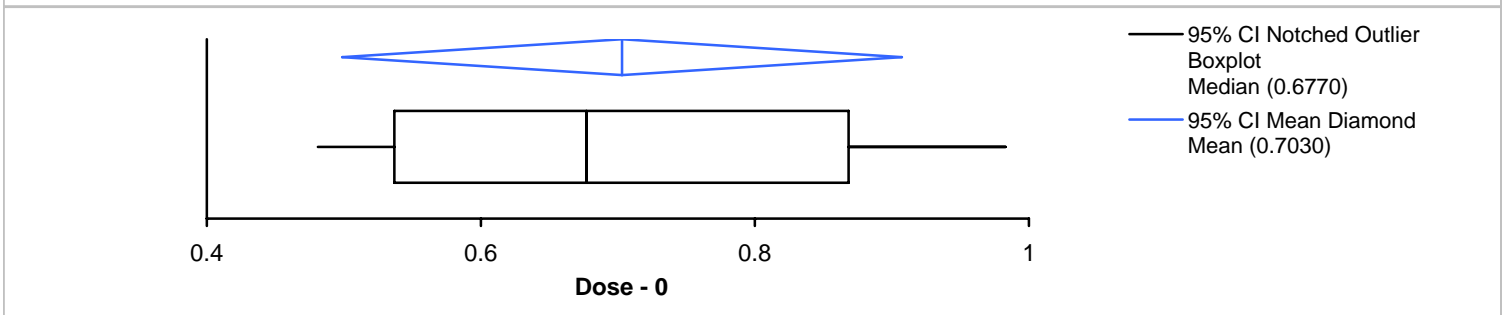

|                |                  |            |                       |
|----------------|------------------|------------|-----------------------|
| n              | 6                |            |                       |
| Mean           | 0.7030           | Median     | 0.6770                |
| 95% CI         | 0.4988 to 0.9072 | 96.9% CI   | 0.4810 to 0.9830      |
| SE             | 0.07945          |            |                       |
| Variance       | 0.0379           | Range      | 0.502                 |
| SD             | 0.1946           | IQR        | 0.3315                |
| 95% CI         | 0.1215 to 0.4773 |            |                       |
| CV             | 27.7%            | Percentile |                       |
| Skewness       | 0.40             | 0th        | 0.4810 (minimum)      |
| Kurtosis       | -1.41            | 25th       | 0.5369 (1st quartile) |
|                |                  | 50th       | 0.6770 (median)       |
|                |                  | 75th       | 0.8684 (3rd quartile) |
|                |                  | 100th      | 0.9830 (maximum)      |
| Shapiro-Wilk W | 0.95             |            |                       |
| p              | 0.742            |            |                       |
