# Supplementary material for: Combining the in vivo comet and micronucleus assays: a practical approach to genotoxicity testing and data interpretation
Source: PubMed Central journal article supplement — Mutagenesis. 2009 Dec 6;25(2):187–99. doi: 10.1093/mutage/gep060 (PMC2825345; doi:10.1093/mutage/gep060), 2009-12-06
Supplement: gep060_2.pdf [file gep060_2.pdf]

Test **Describe - Summary**  
 Normal Distribution of OTM Data  
 Dose - 0

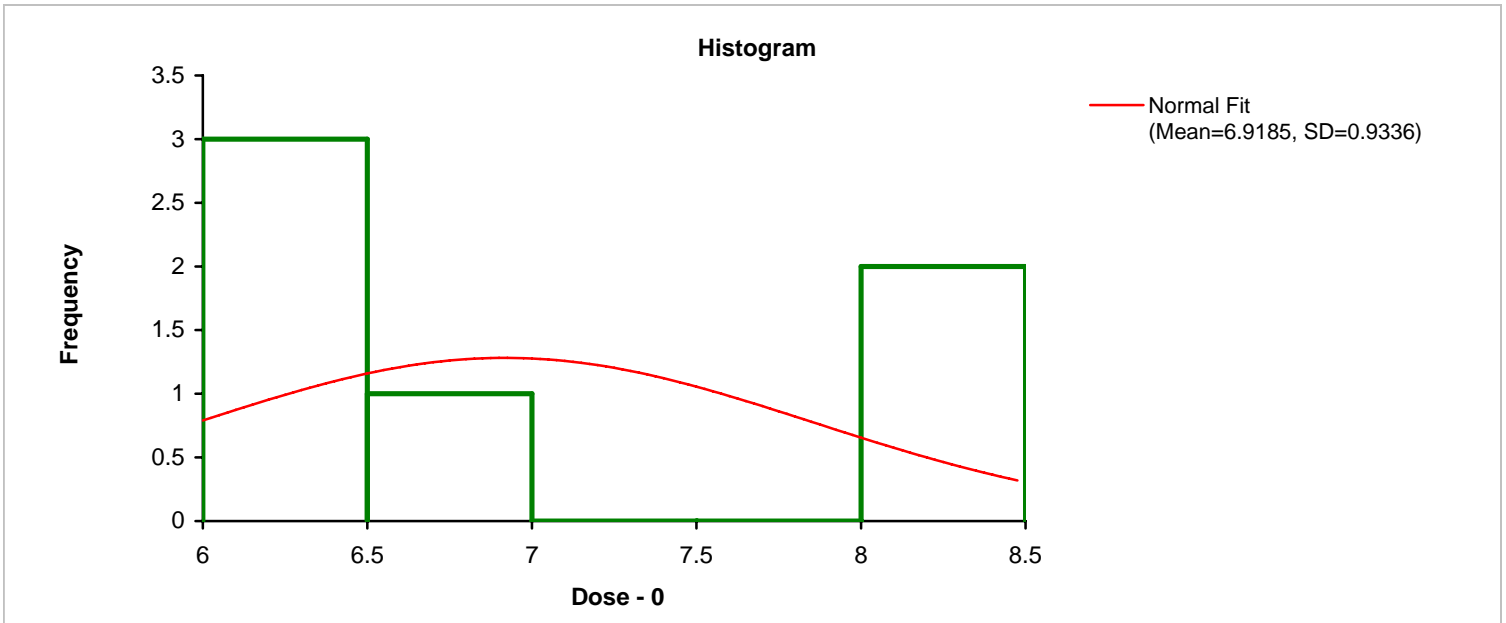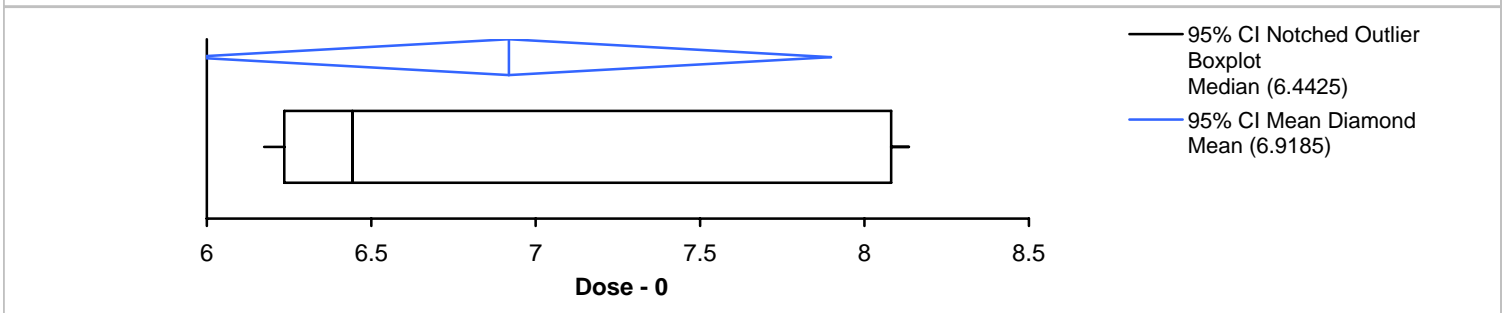

|                |                  |            |                       |
|----------------|------------------|------------|-----------------------|
| n              | 6                |            |                       |
| Mean           | 6.9185           | Median     | 6.4425                |
| 95% CI         | 5.9388 to 7.8982 | 96.9% CI   | 6.1740 to 8.1350      |
| SE             | 0.38114          |            |                       |
| Variance       | 0.8716           | Range      | 1.961                 |
| SD             | 0.9336           | IQR        | 1.8455                |
| 95% CI         | 0.5828 to 2.2897 |            |                       |
| CV             | 13.5%            | Percentile |                       |
| Skewness       | 0.85             | 0th        | 6.1740 (minimum)      |
| Kurtosis       | -1.91            | 25th       | 6.2354 (1st quartile) |
|                |                  | 50th       | 6.4425 (median)       |
|                |                  | 75th       | 8.0809 (3rd quartile) |
|                |                  | 100th      | 8.1350 (maximum)      |
| Shapiro-Wilk W | 0.75             |            |                       |
| p              | 0.021            |            |                       |
